# Supplementary material for: A&#160;review on ocular findings in mouse lemurs: potential links to age and genetic background
Source: Copernicus journal article supplement (doi:10.5194/pb-4-215-2017), 2017-10-27
Supplement: Supplementary file 1 [file pb-4-215-2017-supplement.zip]

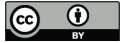

## *Supplement of*

# **A review on ocular findings in mouse lemurs: potential links to age and genetic background**

**Marko Dubicanac et al.**

*Correspondence to:* Elke Zimmermann ([elke.zimmermann@tiho-hannover.de](mailto:elke.zimmermann@tiho-hannover.de))

- [pb-4-215-2017-supplement-title-page.pdf](#)
- [DataSet\\_PB.xlsx](#)

The copyright of individual parts of the supplement might differ from the CC BY 3.0 License.
