# Supplementary material for: A review on ocular findings in mouse lemurs: potential links to age and genetic background
Source: Primate Biol. 2017 Oct 27;4(2):215–28. doi: 10.5194/pb-4-215-2017 (PMC7041539; doi:10.5194/pb-4-215-2017)
Supplement: The supplement related to this article is available online at: https://doi.org/10.5194/pb-4-215-2017-supplement. [file pb-4-215-supplement.zip › DataSet_PB.xlsx]

## Sheet: Tabelle1
Chip-nr.	Sex	age	intraocular hypertension	pupil seclusion	synechia	exophthalmos	trichiasis	ectopia lentis	phtisis bulbi	hyphema	cataract	nuclear sclerosis
F620	F	1.79726	no	no	no	no	no	no	no	no	no	yes
CB41	M	2.7589	no	no	no	no	no	no	no	no	no	yes
A621	M	3.75068	no	no	no	no	no	no	no	no	no	yes
806E	F	3.78904	no	no	no	no	no	no	no	no	no	yes
99C2	F	3.81096	no	no	no	no	no	no	no	no	no	yes
7FB2	F	3.8137	no	no	no	no	no	no	no	no	no	yes
A499	M	3.87945	no	no	no	no	no	no	no	no	no	yes
6750	F	3.89041	no	no	no	no	no	no	no	no	no	yes
B23D	M	3.91507	no	no	no	no	no	no	no	no	no	yes
B0D6	M	3.92877	no	no	no	no	no	no	no	no	no	yes
0751	F	4.72603	no	no	no	no	no	no	no	no	no	yes
F654	M	4.76712	no	no	no	no	no	no	no	no	no	yes
E95E	F	4.87123	no	no	no	no	no	no	no	no	no	yes
527A	F	6.70411	no	no	no	no	no	no	no	no	no	yes
1029	F	7.72055	no	no	no	no	no	no	no	no	no	yes
9046	M	7.88767	no	no	no	no	no	no	no	no	no	yes
A734	M	3.87397	no	no	no	no	no	no	no	no	yes	no
5AE8	F	3.90137	no	no	no	no	no	no	no	no	yes	no
AB62	M	3.87671	no	no	no	no	no	no	no	no	yes	yes
D01E	F	5.93973	no	no	no	no	no	no	no	no	yes	yes
1A20	M	6.86301	no	no	no	no	yes	no	no	no	yes	yes
361E	F	8.61096	no	no	no	no	no	no	no	no	yes	yes
27CF	F	8.84932	no	no	no	no	no	no	no	no	yes	yes
A576	F	8.91507	no	no	no	no	no	no	no	no	yes	yes
916C	F	3.91507	no	no	no	no	no	no	no	no	yes	yes
E778	F	4.76438	no	no	no	no	no	no	no	no	yes	yes
B832	M	5.92055	no	no	no	no	no	no	no	no	yes	yes
735F	F	6.70411	no	no	no	no	no	no	no	no	yes	yes
3B2A	M	10.7014	no	no	no	no	no	no	no	no	yes	yes
E597	F	10.7425	no	no	no	no	no	no	no	no	yes	yes
A6F6	M	3.81096	no	no	no	no	no	no	no	no	yes	yes
F597	F	4.76712	no	no	no	no	no	no	no	no	yes	yes
0921	M	4.85753	no	no	no	no	no	no	no	no	yes	yes
BA8C	F	5.93973	no	no	no	no	no	no	no	no	yes	yes
2F0B	F	6.89589	no	no	no	no	no	no	no	no	yes	yes
3F2A	M	8.5863	no	no	no	no	no	no	no	no	yes	yes
ED9B	M	8.66849	no	no	no	no	no	no	no	no	yes	yes
EF7F	M	8.88493	no	no	no	no	no	no	no	no	yes	yes
3E51	F	11.7233	no	no	no	no	no	no	no	no	yes	yes
5121	F	9.92603	no	yes	no	no	no	no	no	no	yes	no
3C7C	F	13.6247	no	yes	yes	no	no	no	no	no	yes	no
F36B	F	9.90411	yes	yes	no	yes	no	no	yes	yes	yes	no
C1F5	M	0.939726	no	no	no	no	no	no	no	no	no	no
43C5	M	2.81096	no	no	no	no	no	no	no	no	no	no
A699	F	2.92055	no	no	no	no	no	no	no	no	no	no
C745	F	5.71507	no	no	no	no	no	no	no	no	yes	yes
E43E	F	5.80548	no	no	no	no	no	no	no	no	no	no
9ABB	F	6.85479	no	no	no	no	no	no	no	no	yes	yes
83FB	F	6.87397	no	no	no	no	no	no	no	no	no	yes
79BF	M	7.69041	no	no	no	no	no	no	no	no	no	yes
52E1	F	8.63014	no	no	no	no	no	no	no	no	yes	yes
5507	F	8.75068	no	no	no	no	no	no	no	no	yes	yes
7133	M	8.79178	no	no	no	no	no	no	no	no	yes	yes
46DA	M	11.7151	no	no	no	no	no	no	no	no	yes	yes
44CF	M	11.8986	no	yes	no	no	no	no	no	no	yes	no
49E5	M	11.8986	no	yes	no	no	no	no	no	no	yes	no
FBB1	F	1.9	no	no	no	no	no	yes	no	no	no	no
